# Supplementary material for: DNA Damage by Radiopharmaceuticals and Mechanisms of Cellular Repair
Source: MDPI journal article supplement (doi:10.3390/pharmaceutics15122761), 2023-12-12
Supplement: s1 [file s1]

**Table S1.** Characteristics of radionuclides used in radiopharmaceutical therapy.

| Radionuclides     | Particle Emission | Half-Life | Particle Energy (mean MeV) | Maximum Emission Range in Tissue (mm) | Ref         |
|-------------------|-------------------|-----------|----------------------------|---------------------------------------|-------------|
| <sup>225</sup> Ac | $\alpha$ /EC      | 10 d      | 0.21                       | 0.061                                 | [1-5]       |
| <sup>213</sup> Bi | $\alpha/\beta^-$  | 46 mins   | 8.32                       | 0.084                                 | [6-8]       |
| <sup>211</sup> At | $\alpha$          | 7.2 h     | 6.79                       | 0.067                                 | [1,7,8]     |
| <sup>223</sup> Ra | $\alpha/\gamma$   | 11.44 d   | 6.59                       | 0.08                                  | [1,4,9,10]  |
| <sup>177</sup> Lu | $\beta^-/\gamma$  | 6.73 d    | 0.208                      | 1.6                                   | [5,7-12]    |
| <sup>153</sup> Sm | $\beta^-/\gamma$  | 46.50 h   | 0.808                      | 4                                     | [1,2,8-11]  |
| <sup>90</sup> Y   | $\beta^-$         | 2.67 d    | 1.35                       | 12                                    | [6-12]      |
| <sup>89</sup> Sr  | $\beta^-/\gamma$  | 50.53 d   | 0.908                      | 7                                     | [2,8-11]    |
| <sup>131</sup> I  | $\beta^-/\gamma$  | 8.02 d    | 0.356                      | 2.3                                   | [2,8-13]    |
| <sup>3</sup> H    | $\beta^-$         | 12.32 y   | 0.018                      | -                                     | [1,2,6-9]   |
| <sup>32</sup> P   | $\beta^-/\gamma$  | 14.26 d   | 0.695                      | 8.0                                   | [1,2,8]     |
| <sup>137</sup> Cs | $\gamma/\beta^-$  | 30 y      | 0.5120                     | -                                     | [1,2,6-8]   |
| <sup>60</sup> Co  | $\gamma/\beta^-$  | 5.27 y    | 1.1732                     | -                                     | [1,2,3]     |
| <sup>123</sup> I  | $\gamma$ /EC      | 13 h      | 0.013                      | 0.001                                 | [3,5,12-15] |

|                   |      |      |       |        |              |
|-------------------|------|------|-------|--------|--------------|
| <sup>125</sup> I  | γ/AE | 57 d | 0.023 | 0.0001 | [3,12,16,17] |
| <sup>111</sup> In | γ/EC | 67 h | 0.007 | 0.04   | [3,18-22]    |
| <sup>99m</sup> Tc | γ/AE | 6 h  | 0.005 | -      | [3,23]       |

EC: Electron Capture, AE: Auger Electron, d: Day, h: Hour, y: Year, mins: Minutes.

## References

- Yeong, C.-H.; Cheng, M.-h.; Ng, K.-H. Therapeutic radionuclides in nuclear medicine: current and future prospects. *Journal of Zhejiang University Science. B* **2014**, *15*, 845.
- Elliyanti, A. Radiopharmaceuticals in modern cancer therapy. In *Radiopharmaceuticals-Current Research for Better Diagnosis and Therapy*; IntechOpen: 2021.
- Ku, A.; Facca, V.J.; Cai, Z.; Reilly, R.M. Auger electrons for cancer therapy—a review. *EJNMMI radiopharmacy and chemistry* **2019**, *4*, 1-36.
- Navalkisoor, S.; Grossman, A. Targeted alpha particle therapy for neuroendocrine tumours: the next generation of peptide receptor radionuclide therapy. *Neuroendocrinology* **2019**, *108*, 256-264.
- Parsi, M.; Desai, M.H.; Desai, D.; Singhal, S.; Khandwala, P.M.; Potdar, R.R. PSMA: A game changer in the diagnosis and treatment of advanced prostate cancer. *Medical Oncology* **2021**, *38*, 1-20.
- Salih, S.; Alkatheeri, A.; Alomaim, W.; Elliyanti, A. Radiopharmaceutical treatments for cancer therapy, radionuclides characteristics, applications, and challenges. *Molecules* **2022**, *27*, 5231.
- Widel, M.; Przybyszewski, W.M.; Cieslar-Pobuda, A.; Saenko, Y.V.; Rzeszowska-Wolny, J. Bystander normal human fibroblasts reduce damage response in radiation targeted cancer cells through intercellular ROS level modulation. *Mutation Research/Fundamental and Molecular Mechanisms of Mutagenesis* **2012**, *731*, 117-124.
- Elliyanti, A. Molecular radiobiology and radionuclides therapy concepts. *The Evolution of Radionuclide Targeting towards Clinical Precision Oncology: A Festschrift in Honor of Kalevi Kairemo* **2022**, 395-408.
- Hillegonds, D.J.; Franklin, S.; Shelton, D.K.; Vijayakumar, S.; Vijayakumar, V. The management of painful bone metastases with an emphasis on radionuclide therapy. *Journal of the National Medical Association* **2007**, *99*, 785.
- Qaim, S.M. Therapeutic radionuclides and nuclear data. *Radiochimica Acta* **2001**, *89*, 297-304.
- Asadian, S.; Mirzaei, H.; Kalantari, B.A.; Davarpanah, M.R.; Mohamadi, M.; Shpichka, A.; Nasehi, L.; Es, H.A.; Timashev, P.; Najimi, M. β-radiating radionuclides in cancer treatment, novel insight into promising approach. *Pharmacological research* **2020**, *160*, 105070.
- Luster, M.; Pfestroff, A.; Hänscheid, H.; Verburg, F.A. Radioiodine therapy. In *Proceedings of the Seminars in nuclear medicine*, 2017; pp. 126-134.
- Slonimsky, E.; Tulchinsky, M. Radiotheragnostics paradigm for radioactive iodine (Iodide) management of differentiated thyroid cancer. *Current Pharmaceutical Design* **2020**, *26*, 3812-3827.
- Balagurumoorthy, P.; Wang, K.; Adelstein, S.J.; Kassis, A.I. DNA double-strand breaks induced by decay of 123I-labeled Hoechst 33342: role of DNA topology. *International journal of radiation biology* **2008**, *84*, 976-983.
- Reske, S.N.; Deisenhofer, S.; Glatting, G.; Zlatopolskiy, B.D.; Morgenroth, A.; Vogg, A.T.; Buck, A.K.; Friesen, C. 123I-ITdU-mediated nanoirradiation of DNA efficiently induces cell kill in HL60 leukemia cells and in doxorubicin-, β-, or γ-radiation-resistant cell lines. *Journal of Nuclear Medicine* **2007**, *48*, 1000-1007.
- Balagurumoorthy, P.; Xu, X.; Wang, K.; Adelstein, S.J.; Kassis, A.I. Effect of distance between decaying 125I and DNA on Auger-electron induced double-strand break yield. *International journal of radiation biology* **2012**, *88*, 998-1008.
- Paillas, S.; Boudousq, V.; Piron, B.; Kersual, N.; Bardiès, M.; Chouin, N.; Bascoul-Molle, C.; Arnaud, F.-X.; Pèlegri, A.; Navarro-Teulon, I. Apoptosis and p53 are not involved in the anti-tumor efficacy of 125I-labeled monoclonal antibodies targeting the cell membrane. *Nuclear medicine and Biology* **2013**, *40*, 471-480.
- Nordberg, E.; Orlova, A.; Friedman, M.; Tolmachev, V.; Ståhl, S.; Nilsson, F.Y.; Glimelius, B.; Carlsson, J. In vivo and in vitro uptake of 111In, delivered with the affibody molecule (ZEGFR: 955) 2, in EGFR expressing tumour cells. *Oncology reports* **2008**, *19*, 853-857.
- Costantini, D.L.; Chan, C.; Cai, Z.; Vallis, K.A.; Reilly, R.M. 111In-labeled trastuzumab (Herceptin) modified with nuclear localization sequences (NLS): an Auger electron-emitting radiotherapeutic agent for HER2/neu-amplified breast cancer. *Journal of Nuclear Medicine* **2007**, *48*, 1357-1368.
- Cai, Z.; Chen, Z.; Bailey, K.E.; Scollard, D.A.; Reilly, R.M.; Vallis, K.A. Relationship between induction of phosphorylated H2AX and survival in breast cancer cells exposed to 111In-DTPA-hEGF. *Journal of Nuclear Medicine* **2008**, *49*, 1353-1361.
- Chen, P.; Wang, J.; Hope, K.; Jin, L.; Dick, J.; Cameron, R.; Brandwein, J.; Minden, M.; Reilly, R.M. Nuclear localizing sequences promote nuclear translocation and enhance the radiotoxicity of the anti-CD33 monoclonal antibody HuM195 labeled with 111In in human myeloid leukemia cells. *J Nucl Med* **2006**, *47*, 827-836.
- Chen, P.; Wang, J.; Hope, K.; Jin, L.; Dick, J.; Cameron, R.; Brandwein, J.; Minden, M.; Reilly, R.M. Nuclear localizing sequences promote nuclear translocation and enhance the radiotoxicity of the anti-CD33 monoclonal antibody HuM195 labeled with 111In in human myeloid leukemia cells. *Journal of Nuclear Medicine* **2006**, *47*, 827-836.
- Kotzerke, J.; Punzet, R.; Runge, R.; Ferl, S.; Oehme, L.; Wunderlich, G.; Freudenberger, R. 99mTc-labeled HYNIC-DAPI causes plasmid DNA damage with high efficiency. *PLoS One* **2014**, *9*, e104653.
